# Supplementary material for: Genetic and phenotypic analysis of the causal relationship between aging and COVID-19
Source: PubMed Central journal article supplement (PMC9053191; doi:10.1038/s43856-021-00033-z), 2021-10-05
Supplement: 43856_2021_33_MOESM1_ESM.pdf [file 43856_2021_33_MOESM1_ESM.pdf]

## Supplementary Tables and Figures

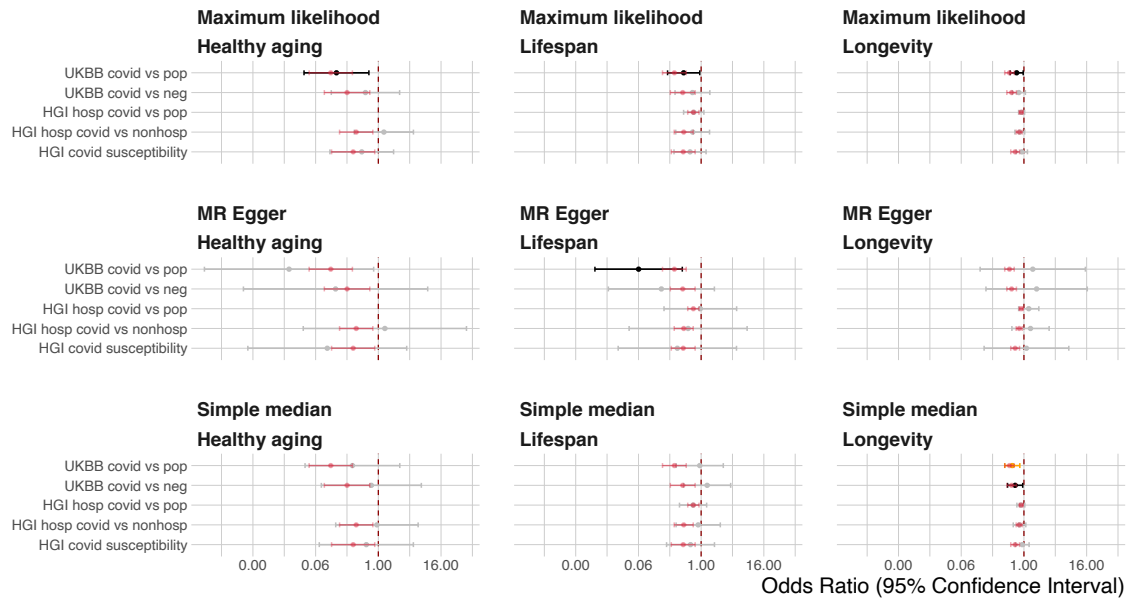

**Figure S1. Sensitivity analysis of the association between lifespan-related traits and the risk of COVID-19.** This forest plot shows Mendelian randomization estimates for the causal effect of lifespan-related traits on the risk of COVID-19 based on three different MR methods (Maximum likelihood, MR-Egger, and simple median). Error bars show 95% confidential interval. Significant effects with FDR < 0.05 are in orange. Nominally significant effects ( $P < 0.05$ ) are in black. Red error bar represents the estimated causal effect from the main analysis.

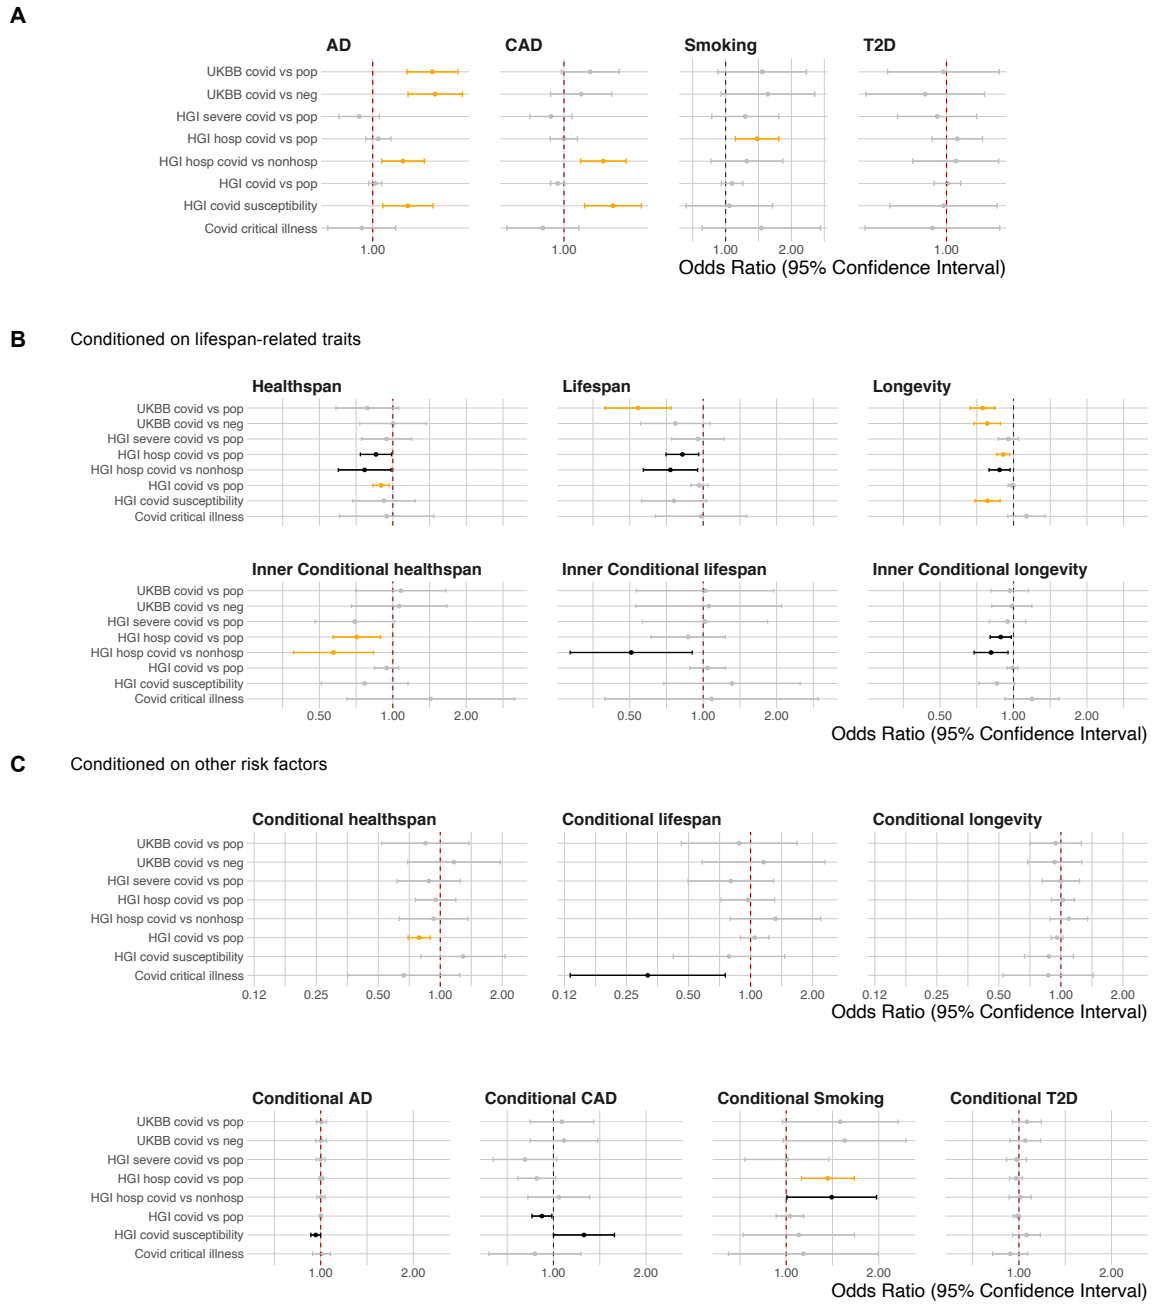

**Figure S2. Conditional analysis of the association between lifespan-related traits and the risk of COVID-19.** **A.** Forest plot showing Mendelian randomization estimates for the causal effect of age-related risk factors on the risk of COVID-19. **B.** Forest plot showing Mendelian randomization estimates for the causal effect of univariate and multivariate lifespan-related traits on the risk of COVID-19. **C.** Forest plot showing Mendelian randomization estimates for the causal effect of traits (conditioned on age-related risk factors) on the risk of COVID-19. Error bars show the 95% confidential interval. Significant effects with  $FDR < 0.05$  are in orange. Nominally significant effects ( $P < 0.05$ ) are in black.

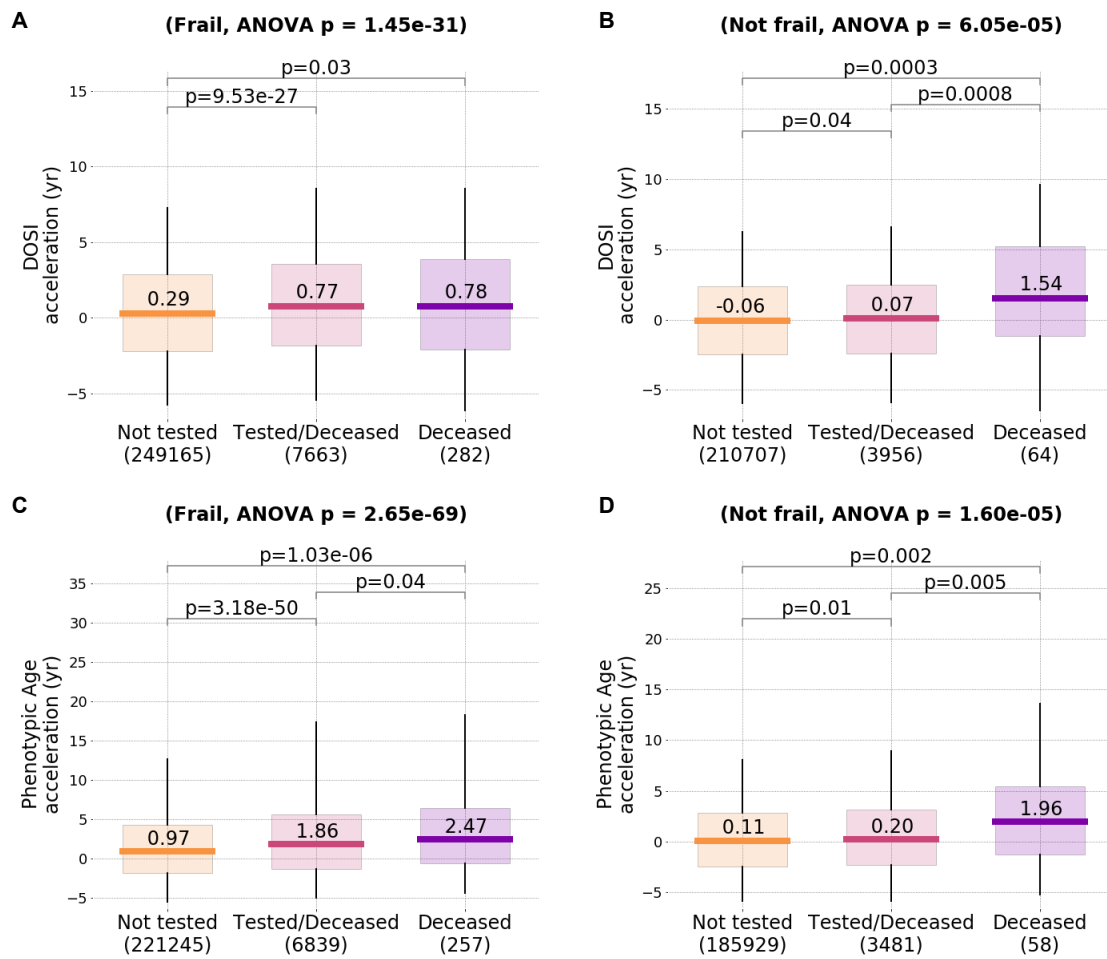

**Figure S3. Biological age acceleration in COVID-19 patients from UKBB cohort.** Box plot showing the distribution of biological age acceleration measured in different groups. The sample size (N) for each group is shown under the x-axis. Boxes indicate 25%-75% interquartile ranges, and whiskers indicate minimum to maximum. **A, B.** BAA measured by DOSI. **C, D.** BAA measured by Phenotypic Age.

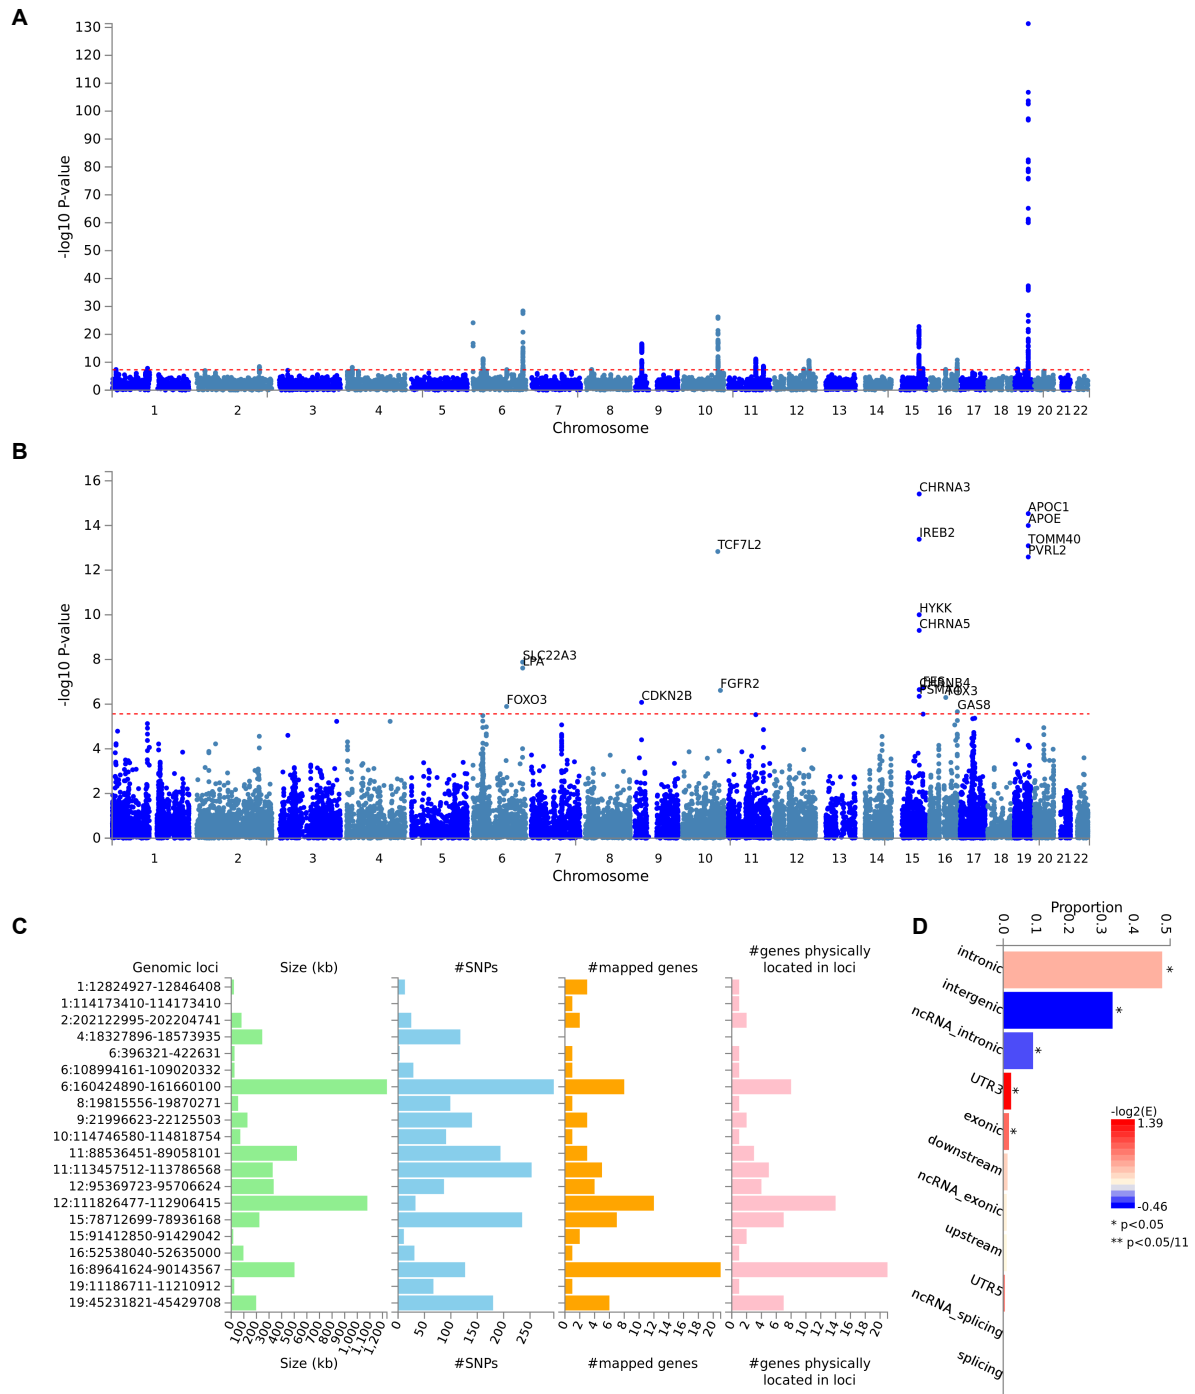

**Figure S4. Twenty bivariate loci identified at genome-wide significance.** **A.** Manhattan plot showing the nominal strength of association  $-\log_{10}(P \text{ value})$  on the y-axis against the chromosomal position of SNPs on the x-axis, where the null hypothesis is no association with healthy aging and COVID-19 infection. **B.** Manhattan plot of the gene-based test as computed by MAGMA test. SNPs were mapped to 18370 protein coding genes. Genome wide significance (red dashed line in the plot) was defined at  $P = 0.05/18370 = 2.722e-6$ . **C.** The histogram presenting summary results per genomic locus. **D.** Histogram displays the proportion of SNPs with functional annotation assigned by ANNOVAR. Bars are colored by  $\log_2(\text{enrichment})$  relative to all SNPs in the selected reference panel.

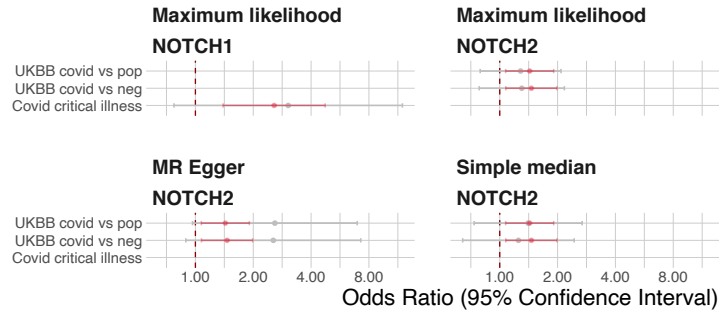

**Figure S5. Sensitivity analysis of the association between Notch and the risk of COVID-19.** Forest plot showing Mendelian randomization estimates for the causal effect of blood expression of Notch1/2 on the risk of COVID-19 from three different MR methods (Maximum likelihood, MR-Egger, and simple median). Error bars show the 95% confidential interval. Significant effects with FDR < 0.05 are in orange. Nominally significant effects ( $P < 0.05$ ) are in black. Red error bar represents the estimated causal effect from the main analysis.

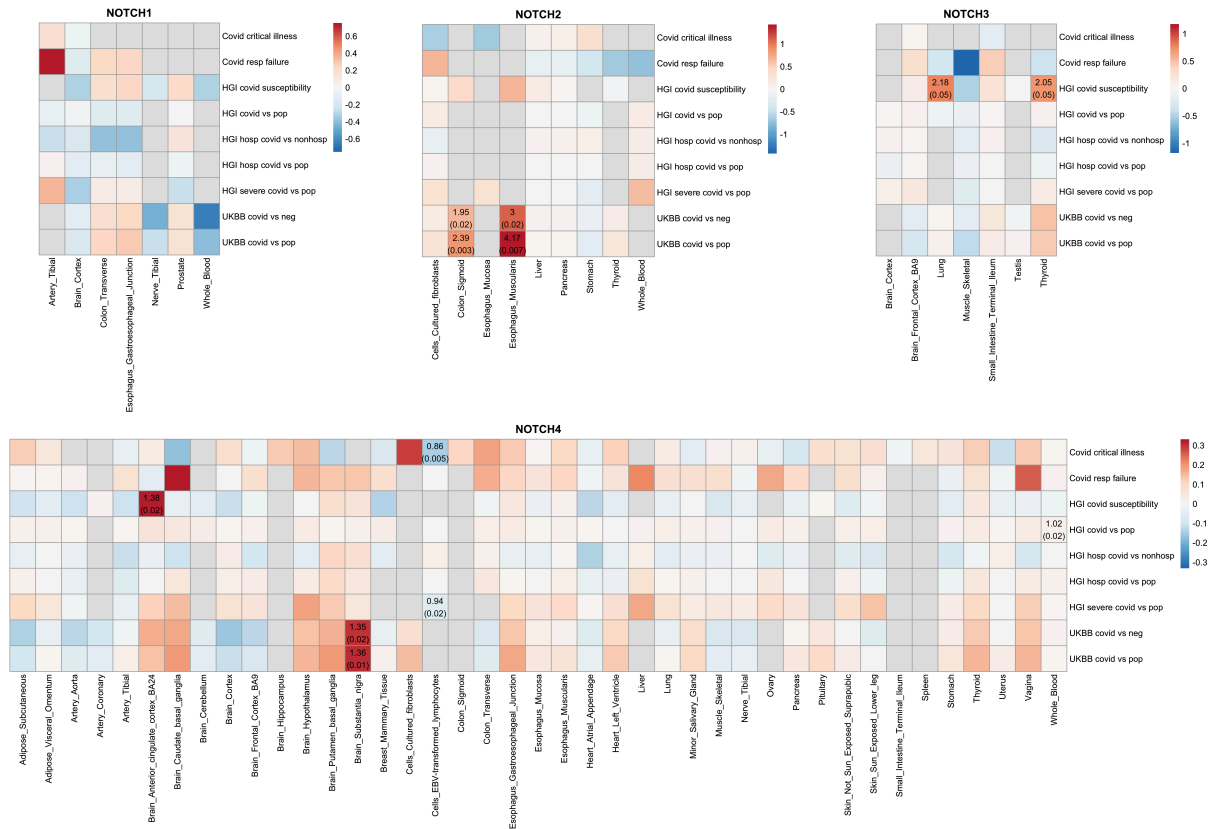

**Figure S6. Mendelian randomization analysis investigating the association of tissue-specific Notch expression with the risk of COVID-19.** Shown are the results of GSMR analyses with tissue-specific Notch expression from GTEx V8. Colors represent the effect sizes (as measured by log odds ratios, log ORs) of expression on COVID-19, red for risk effects, blue for protective effects, and gray means the effect cannot be estimated due to limited available SNPs. Nominally significant effects ( $P < 0.05$ ) are labeled with OR (P-value).

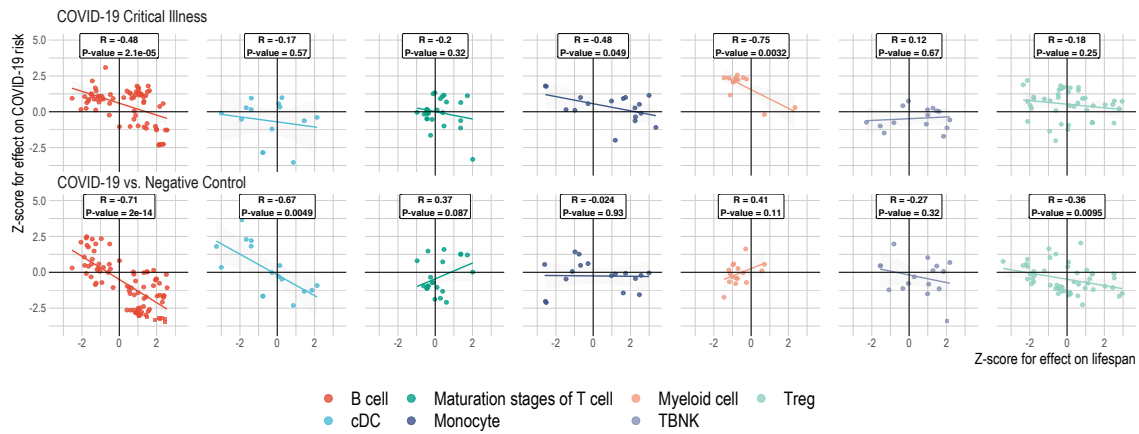

**Figure S7. Negative correlation between the effect of immune cell traits on lifespan and COVID-19 risk in different immune cell type panels.** Mendelian Randomization results showing the effect of immune cell surface marker levels on lifespan (x-axis); the y-axis shows the Z-score for the risk of COVID-19 infection and COVID-19 critical illness. Each panel represent a cell type. Traits with FDR < 0.05 for at least one outcome are shown in squares.

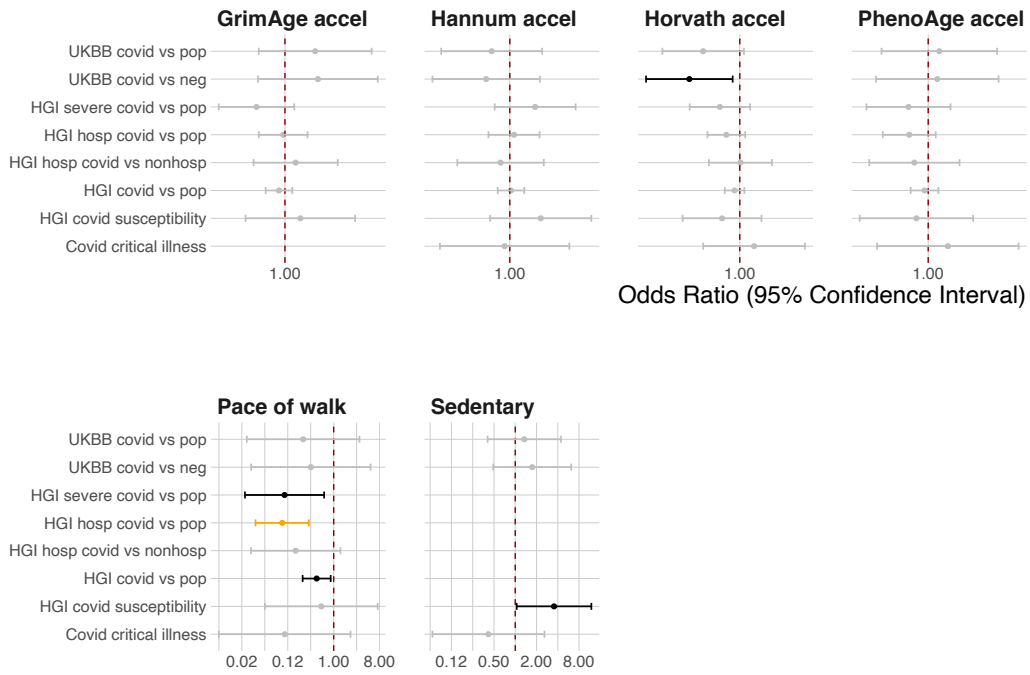

**Figure S8. Mendelian randomization analysis investigating the association of genetically proxied epigenetic age acceleration and physical activity with the risk of COVID-19.** Forest plots showing Mendelian randomization estimates for the causal effect of epigenetic age acceleration and physical activity on the risk of COVID-19. Error bars show the 95% confidential interval. Significant effects with FDR < 0.05 are in orange. Nominally significant effects (P < 0.05) are in black.



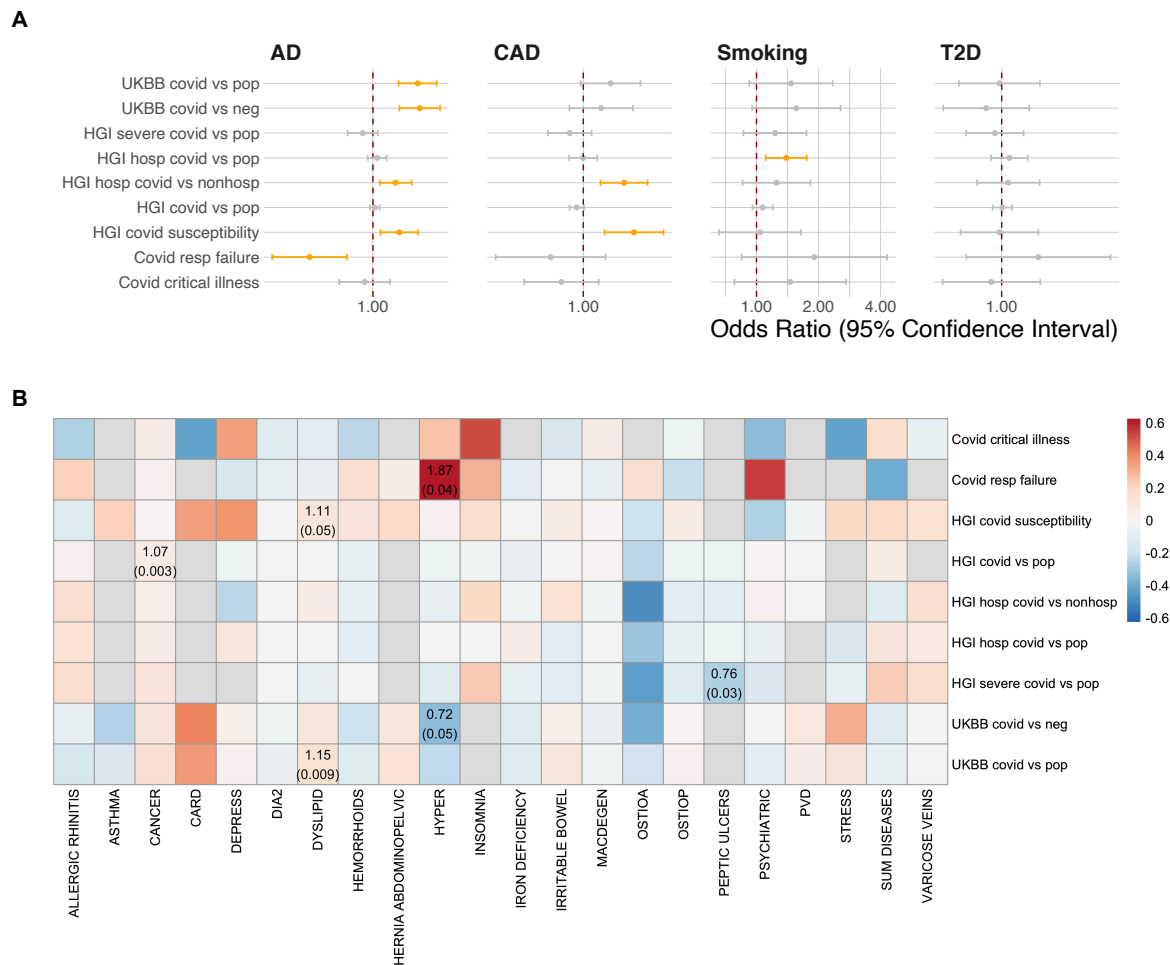

**Figure S9. Putative causal associations between diseases and the risk of COVID-19.** **A.** Forest plots showing Mendelian randomization estimates for the causal effect of lifespan-related risk factors on the risk of COVID-19. Error bars show the 95% confidential interval. Significant effects with FDR < 0.05 are in orange. Nominally significant effects ( $P < 0.05$ ) are in black. **B.** Shown are the results of GSMR analyses with disease data from a community-based study (GERA). Colors represent the effect sizes (as measured by log odds ratios, log ORs) of diseases on COVID-19, red for risk effects, blue for protective effects, and gray means the effect cannot be estimated due to limited available SNPs. Nominally significant effects ( $P < 0.05$ ) are labeled with OR (P-value).

**Table S1. Exposure and outcome trait genetic summary data sources**

| Trait                                                  | Abbreviation              | Ancestry                | N<br>(N <sub>cases</sub> /N <sub>controls</sub> ) | Publication (source)                                               | URLs                                                                                                                                                                                                                                                                                      |
|--------------------------------------------------------|---------------------------|-------------------------|---------------------------------------------------|--------------------------------------------------------------------|-------------------------------------------------------------------------------------------------------------------------------------------------------------------------------------------------------------------------------------------------------------------------------------------|
| Healthspan                                             | Healthspan                | European                | 300,447                                           | Zenin <i>et al.</i> 2019 <i>Communications biology</i>             | <a href="https://zenodo.org/record/1302861/files/healthspan_summary.csv.gz?download=1">https://zenodo.org/record/1302861/files/healthspan_summary.csv.gz?download=1</a>                                                                                                                   |
| Lifespan                                               | Lifespan                  | European                | 1,012,240                                         | Timmers <i>et al.</i> 2019 <i>Elife</i>                            | <a href="https://datashare.is.ed.ac.uk/bitstream/handle/10283/3209/lifegen_phase2_bothpl_alldr_2017_09_18.tsv.gz?sequence=1&amp;isAllowed=y">https://datashare.is.ed.ac.uk/bitstream/handle/10283/3209/lifegen_phase2_bothpl_alldr_2017_09_18.tsv.gz?sequence=1&amp;isAllowed=y</a>       |
| Longevity (age >90th survival percentile)              | Longevity                 | European                | 11,262/25,483                                     | Deelen <i>et al.</i> 2019 <i>Nature Communications</i>             | <a href="https://www.longevitygenomics.org/downloads">https://www.longevitygenomics.org/downloads</a>                                                                                                                                                                                     |
| Meta-analysis of Healthspan, Lifespan and Longevity    | Healthy aging             | European                | -                                                 | Timmers <i>et al.</i> 2020 <i>Nature Communications</i>            | <a href="https://datashare.is.ed.ac.uk/bitstream/handle/10283/3599/timmers2020_healthspan_lifespan_longevity.tsv.gz?sequence=2&amp;isAllowed=y">https://datashare.is.ed.ac.uk/bitstream/handle/10283/3599/timmers2020_healthspan_lifespan_longevity.tsv.gz?sequence=2&amp;isAllowed=y</a> |
| Hannum age                                             | Hannum accel              | European                | 34,449                                            | McCartney <i>et al.</i> 2020 <i>BioRxiv</i>                        | <a href="https://datashare.is.ed.ac.uk/handle/10283/3645">https://datashare.is.ed.ac.uk/handle/10283/3645</a>                                                                                                                                                                             |
| Horvath age                                            | Horvath accel             |                         |                                                   |                                                                    |                                                                                                                                                                                                                                                                                           |
| PhenoAge                                               | PhenoAge accel            |                         |                                                   |                                                                    |                                                                                                                                                                                                                                                                                           |
| GrimAge                                                | GrimAge accel             |                         |                                                   |                                                                    |                                                                                                                                                                                                                                                                                           |
| SARS-COV-2 infection Positive vs. Population           | UKBB_covid_vs_pop         | European                | 1,503 / 457,747                                   | Genome-Wide Repository of Associations Between SNPs and Phenotypes | <a href="https://grasp.nhbi.nih.gov/downloads/COVID19GWAS/08042020/UKBB_covid19_EUR_080420.txt.gz">https://grasp.nhbi.nih.gov/downloads/COVID19GWAS/08042020/UKBB_covid19_EUR_080420.txt.gz</a>                                                                                           |
| SARS-COV-2 infection Positive vs. Negative (tested)    | UKBB_covid_vs_neg         | European                | 1,503 / 10,632                                    | Genome-Wide Repository of Associations Between SNPs and Phenotypes | <a href="https://grasp.nhbi.nih.gov/downloads/COVID19GWAS/08042020/UKBB_covid19_EURtested_080420.txt.gz">https://grasp.nhbi.nih.gov/downloads/COVID19GWAS/08042020/UKBB_covid19_EURtested_080420.txt.gz</a>                                                                               |
| Critical illness of COVID-19                           | Covid critical illness    | Mixed                   | 2,244                                             | Pairo-Castineira, E. <i>et al.</i> 2020 <i>Nature</i>              |                                                                                                                                                                                                                                                                                           |
| Hospitalized covid vs. not hospitalized covid          | HGI_hosp_covid_vs_nonhosp | Mixed                   | 5,773/15,497                                      | The COVID-19 host genetics initiative                              | <a href="https://storage.googleapis.com/covid19-hg-public/20201215/results/20210107/COVID19_HGI_B1_ALL_leave_23andme_20210107.b37.txt.gz">https://storage.googleapis.com/covid19-hg-public/20201215/results/20210107/COVID19_HGI_B1_ALL_leave_23andme_20210107.b37.txt.gz</a>             |
| Hospitalized covid vs. population                      | HGI_hosp_covid_vs_pop     | Mixed                   | 12,888/1,295,966                                  | The COVID-19 host genetics initiative                              | <a href="https://storage.googleapis.com/covid19-hg-public/20201215/results/20210107/COVID19_HGI_B2_ALL_leave_23andme_20210107.b37.txt.gz">https://storage.googleapis.com/covid19-hg-public/20201215/results/20210107/COVID19_HGI_B2_ALL_leave_23andme_20210107.b37.txt.gz</a>             |
| Susceptibility (affected vs. population)               | HGI_covid_susceptibility  | EUR, FIN, SAS, CEU, AFR | 1,678/674,635                                     | The COVID-19 host genetics initiative                              | <a href="https://storage.googleapis.com/covid19-hg-public/20200508/results/COVID19_HGI_ANA5_20200513.txt.gz">https://storage.googleapis.com/covid19-hg-public/20200508/results/COVID19_HGI_ANA5_20200513.txt.gz</a>                                                                       |
| Very severe respiratory confirmed covid vs. population | HGI_severe_covid_vs_pop   | Mixed                   | 5,582/709,010                                     | The COVID-19 host genetics initiative                              | <a href="https://storage.googleapis.com/covid19-hg-public/20201215/results/20210107/COVID19_HGI_A2_ALL_leave_23andme_20210107.b37.txt.gz">https://storage.googleapis.com/covid19-hg-public/20201215/results/20210107/COVID19_HGI_A2_ALL_leave_23andme_20210107.b37.txt.gz</a>             |
| Covid vs. population                                   | HGI_covid_vs_pop          | Mixed                   | 36,590/1,668,938                                  | The COVID-19 host genetics initiative                              | <a href="https://storage.googleapis.com/covid19-hg-public/20200619/results/build_37/COVID19_HGI_ANA_C2_V2_20200701.b37.txt.gz">https://storage.googleapis.com/covid19-hg-public/20200619/results/build_37/COVID19_HGI_ANA_C2_V2_20200701.b37.txt.gz</a>                                   |

**Table S2.** Detecting pleiotropic effect of lifespan-related traits based on intercept term in MR Egger regression

| Exposure      | Outcome                   | Egger intercept | SE   | P    |
|---------------|---------------------------|-----------------|------|------|
| Healthy aging | HGI covid susceptibility  | 0.02            | 0.02 | 0.36 |
| Healthy aging | HGI hosp covid vs nonhosp | 0.00            | 0.02 | 0.98 |
| Healthy aging | HGI hosp covid vs pop     | -0.01           | 0.02 | 0.71 |
| Healthy aging | UKBB covid vs neg         | 0.02            | 0.03 | 0.50 |
| Healthy aging | UKBB covid vs pop         | 0.03            | 0.03 | 0.24 |
| Lifespan      | HGI covid susceptibility  | 0.02            | 0.04 | 0.66 |
| Lifespan      | HGI hosp covid vs nonhosp | 0.01            | 0.04 | 0.88 |
| Lifespan      | HGI hosp covid vs pop     | -0.01           | 0.02 | 0.71 |
| Lifespan      | UKBB covid vs neg         | 0.05            | 0.04 | 0.23 |
| Lifespan      | UKBB covid vs pop         | 0.07            | 0.03 | 0.04 |
| Longevity     | HGI covid susceptibility  | -0.08           | 0.36 | 0.85 |
| Longevity     | HGI hosp covid vs nonhosp | -0.17           | 0.15 | 0.45 |
| Longevity     | HGI hosp covid vs pop     | -0.11           | 0.08 | 0.39 |
| Longevity     | UKBB covid vs neg         | -0.30           | 0.43 | 0.56 |
| Longevity     | UKBB covid vs pop         | -0.25           | 0.44 | 0.62 |

**Table S3.** Detecting pleiotropic effect of Notch eQTLs based on intercept term in MR Egger regression

| Exposure | Outcome           | Egger intercept | SE   | P    |
|----------|-------------------|-----------------|------|------|
| NOTCH2   | UKBB covid vs neg | -0.05           | 0.04 | 0.18 |
| NOTCH2   | UKBB covid vs pop | -0.06           | 0.04 | 0.14 |

**Table S4.** Common diseases in GERA cohort

| <i>Common Disease</i>               | <i>Abbreviation</i>   | <i>N_cases</i> | <i>N_controls</i> |
|-------------------------------------|-----------------------|----------------|-------------------|
| <i>Asthma</i>                       | ASTHMA                | 10,080         | 51,767            |
| <i>Allergic Rhinitis</i>            | ALLERGIC_RHINITIS     | 15,166         | 46,681            |
| <i>Cardiovascular Disease</i>       | CARD                  | 16,399         | 45,448            |
| <i>Cancer</i>                       | CANCER                | 18,677         | 43,170            |
| <i>Major Depressive Disorder</i>    | DEPRESS               | 7,892          | 53,955            |
| <i>Dermatophytosis</i>              | /                     | 8,428          | 53,419            |
| <i>T2D</i>                          | DIA2                  | 7,624          | 54,223            |
| <i>Dyslipidemia</i>                 | DYSLIPID              | 33,024         | 28,823            |
| <i>Hypertensive Disease</i>         | HYPER                 | 31,000         | 30,847            |
| <i>Hemorrhoids</i>                  | HEMORRHOIDS           | 9,898          | 51,949            |
| <i>Hernia Abdominopelvic Cavity</i> | HERNIA_ABDOMINOPELVIC | 6,864          | 54,983            |
| <i>Insomnia</i>                     | INSOMNIA              | 4,346          | 57,501            |
| <i>Iron Deficiency Anemias</i>      | IRON_DEFICIENCY       | 2,699          | 59,148            |
| <i>Irritable Bowel Syndrome</i>     | IRRITABLE_BOWEL       | 3,359          | 58,488            |
| <i>Macular Degeneration</i>         | MACDEGEN              | 4,026          | 57,821            |
| <i>Osteoarthritis</i>               | OSTIOA                | 22,022         | 39,825            |
| <i>Osteoporosis</i>                 | OSTIOP                | 5,898          | 55,949            |
| <i>Peripheral Vascular Disease</i>  | PVD                   | 4,708          | 57,139            |
| <i>Peptic Ulcer</i>                 | PEPTIC_ULCERS         | 1,004          | 60,843            |
| <i>Psychiatric Disorder</i>         | PSYCHIATRIC           | 9,394          | 52,453            |
| <i>Acute Reaction to Stress</i>     | STRESS                | 4,695          | 57,152            |
| <i>Varicose Veins</i>               | VARICOSE_VEINS        | 2,711          | 59,136            |
